# Supplementary material for: A growth factor-free culture system underscores the coordination between Wnt and BMP signaling in Lgr5+ intestinal stem cell maintenance
Source: PubMed Central journal article supplement (PMC6120946; doi:10.1038/s41421-018-0051-0), 2018-09-04
Supplement: 41421_2018_51_MOESM1_ESM.pdf [file 41421_2018_51_MOESM1_ESM.pdf]

Supplementary Information

**A growth factor-free culture system underscores the coordination  
between Wnt and BMP signaling in Lgr5<sup>+</sup> intestinal stem cell  
maintenance**

Yehua Li<sup>1\*</sup>, Yuan Liu<sup>1\*</sup>, Bofeng Liu<sup>2</sup>, Jilian Wang<sup>3</sup>, Siting Wei<sup>1</sup>, Zhen Qi<sup>1</sup>, Shan  
Wang<sup>1</sup>, Wei Fu<sup>3</sup>, Ye-Guang Chen<sup>1#</sup>

Supplementary Figure 1-4

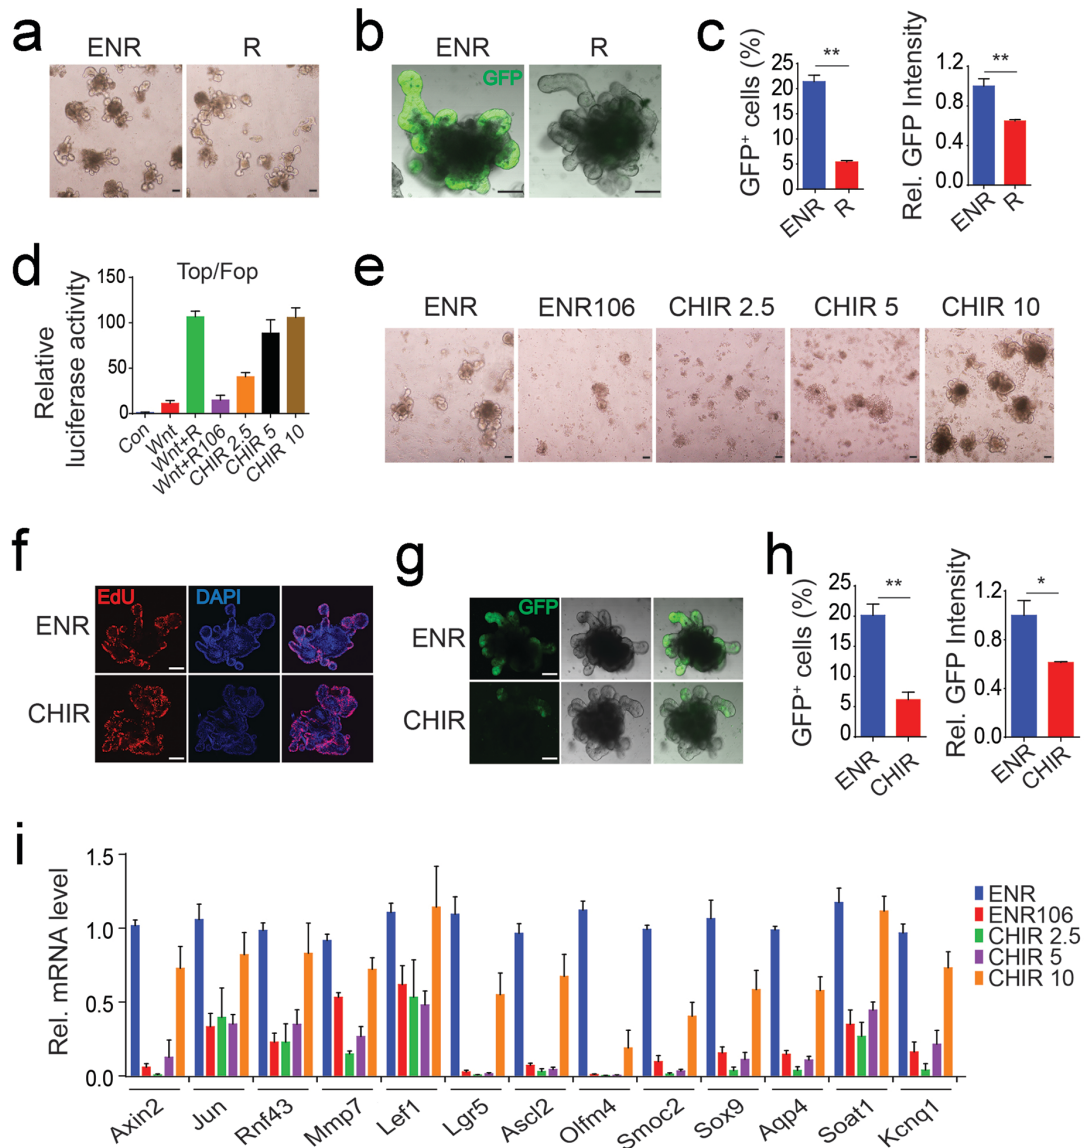

**Supplementary Figure 1. CHIR can substitute R-spondin1 in small intestinal organoid culture.** **a** Representative bright-field images of small intestinal organoids cultured with EGF, Noggin and R-spondin1 (ENR) and only R-spondin1 (R) for 7 days. **b,c** Fluorescence images (**b**) and FACS analysis of GFP expression (**c**) of small intestinal organoids cultured with ENR and R for 7 days. **d** HEK293T cells were transfected with Topflash-Luc or Fopflash-Luc and then treated with Wnt3a, Wnt3a plus R-spondin1 (Wnt+R), Wnt3a plus R-spondin1(F106A) mutant (Wnt+R106), 2.5 $\mu$ M CHIR (CHIR 2.5), 5 $\mu$ M CHIR (CHIR 5) and 10 $\mu$ M CHIR (CHIR 10) for 24

hours before harvested for luciferase activity determination. **e** Representative bright-field images of small intestinal organoids cultured with ENR, CHIR 2.5, CHIR 5, CHIR 10 and EGF, Noggin plus R-spondin1(F106A) for 7 days. **f** EdU staining of proliferation cells in small intestinal organoids cultured with ENR and CHIR for 7 days. **g,h** Fluorescence images (**g**) and FACS analysis of GFP expression (**h**) of small intestinal organoids cultured with ENR and 10 $\mu$ M CHIR for 7 days in. **i** Gene expression of small intestinal organoids cultured with the indicated conditions for 7 days. Scale bars, 100  $\mu$ m. \*\*P < 0.01 and \*P < 0.05 analyzed by Two-way ANOVA test in (**c**) and (**h**). Error bars, s.d. n = 3 mice in (**c**) and (**h**), and n=3 independent experiments in (**d**) and (**f**).

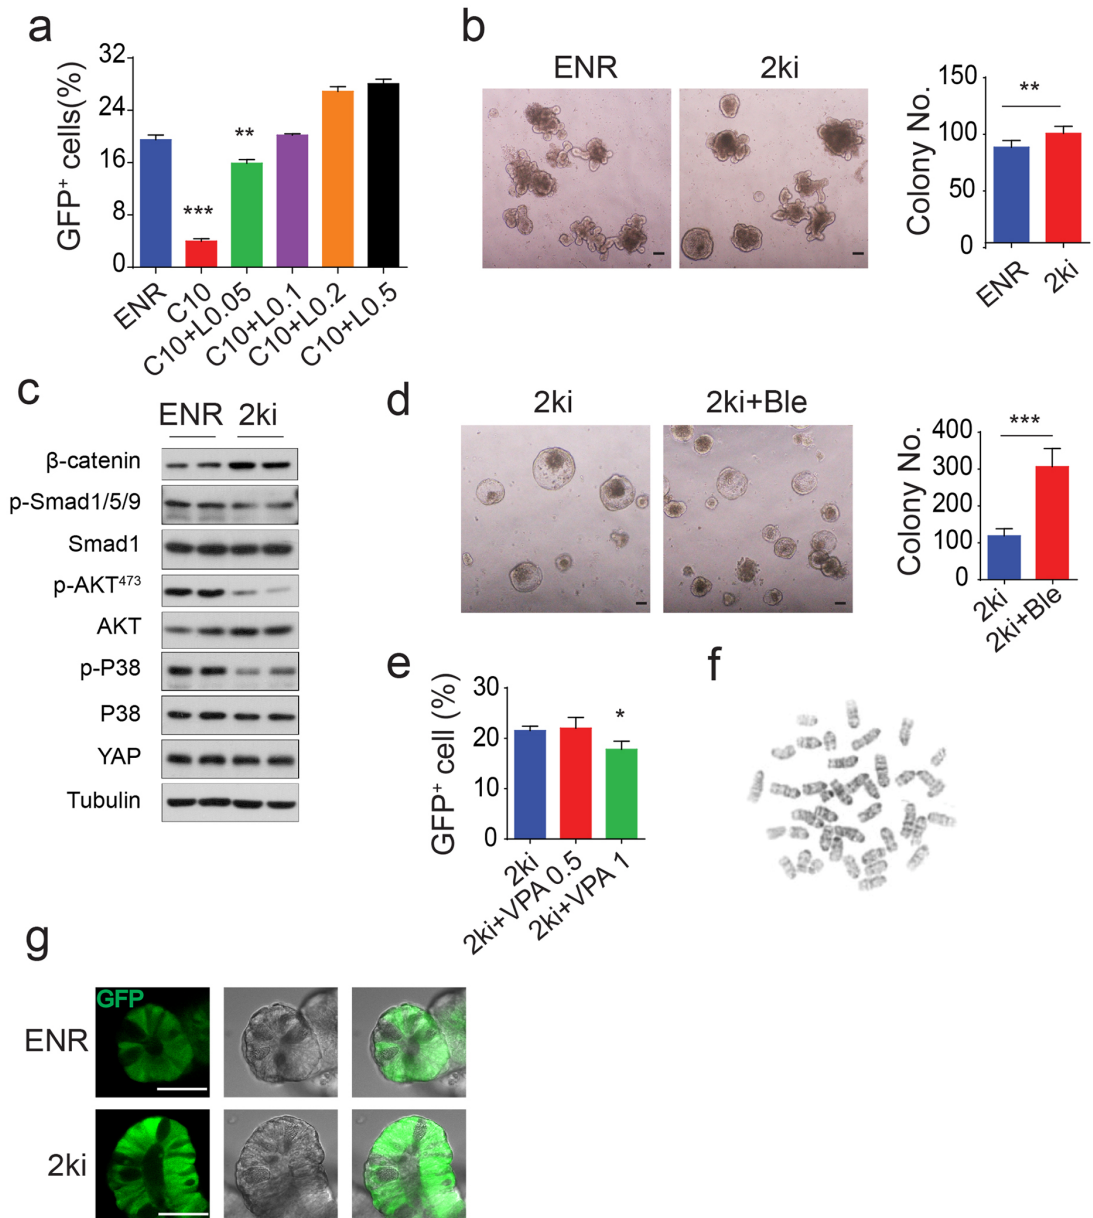

**Supplementary Figure 2. Comparison of organoids cultured with ENR or 2ki. a**

FACS analysis of GFP expression of small intestinal organoids cultured for 7 days in ENR 10 $\mu$ M CHIR or with different concentration of LND. **b** Representative images and quantitation of colony numbers of small intestinal organoids cultured with ENR and 2ki for 7 days. **c** Immunoblotting of protein levels in ENR- or 2ki-cultured organoids. **d** Representative bright-field images and quantitation of colony numbers of organoids cultured in 2ki or 2ki plus 10 $\mu$ M blebbistatin for 4 days. **e** GFP

expression of small intestinal organoids cultured with 2ki or 2ki plus 0.5 mM or 1 mM valproic acid for 7 days. **f** Karyotyping of a cell cultured with 2ki for 2 months. **g** GFP fluorescence images of budding from small intestinal organoids cultured with ENR and 2ki for 2 months. Scale bars, 100  $\mu\text{m}$  in **b** and **d**, 50 $\mu\text{m}$  in **g**. \*\*\*P < 0.001 and \*\*P < 0.01 analyzed by Two-way ANOVA test in **(b)** and **(d)** and by Student's t-test in **(a)** and **(e)**. Error bars, s.d. n = 9 wells from 3 mice in **(b)** and **(d)**, and n=3 wells in **(a)** and **(e)**.

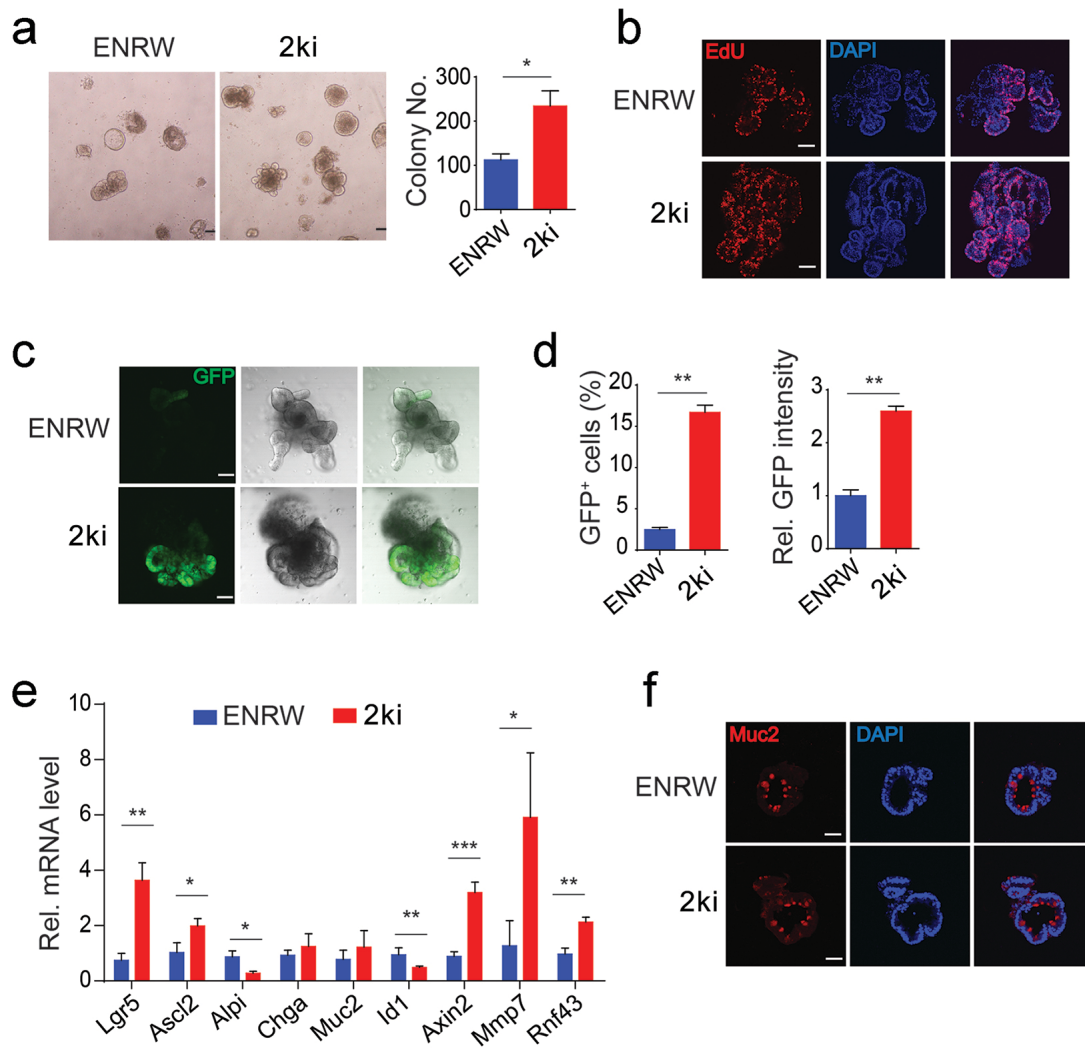

**Supplementary Figure 3. CHIR and LDN together sustain the self-renewal of ISCs from colon crypts.** **a** Representative images and quantitation of colony numbers of colon organoids cultured with EGF, Noggin, R-spondin1 and Wnt3a (ENRW) or CHIR and LDN (2ki). **b** EdU staining of proliferation cells in colon organoids cultured with ENRW and 2ki for 7 days. **c,d** Fluorescence images (**c**) and FACS analysis of GFP expression (**d**) of colon organoids cultured for 7 days. **e** Gene expression of colon organoids cultured for 7 days. **f** The goblet cell marker Mucin 2 staining in colon organoids cultured for 7 days. Scale bars, 100  $\mu$ m. \*\*\* $P < 0.001$ , \*\* $P < 0.01$  and \* $P < 0.05$  analyzed by Two-way ANOVA test in (**b**) and (**d**) and by

Student's t-test in (e). Error bars, s.d. n = 3 mice in (b) and (d), and n=3 independent experiments in (e).

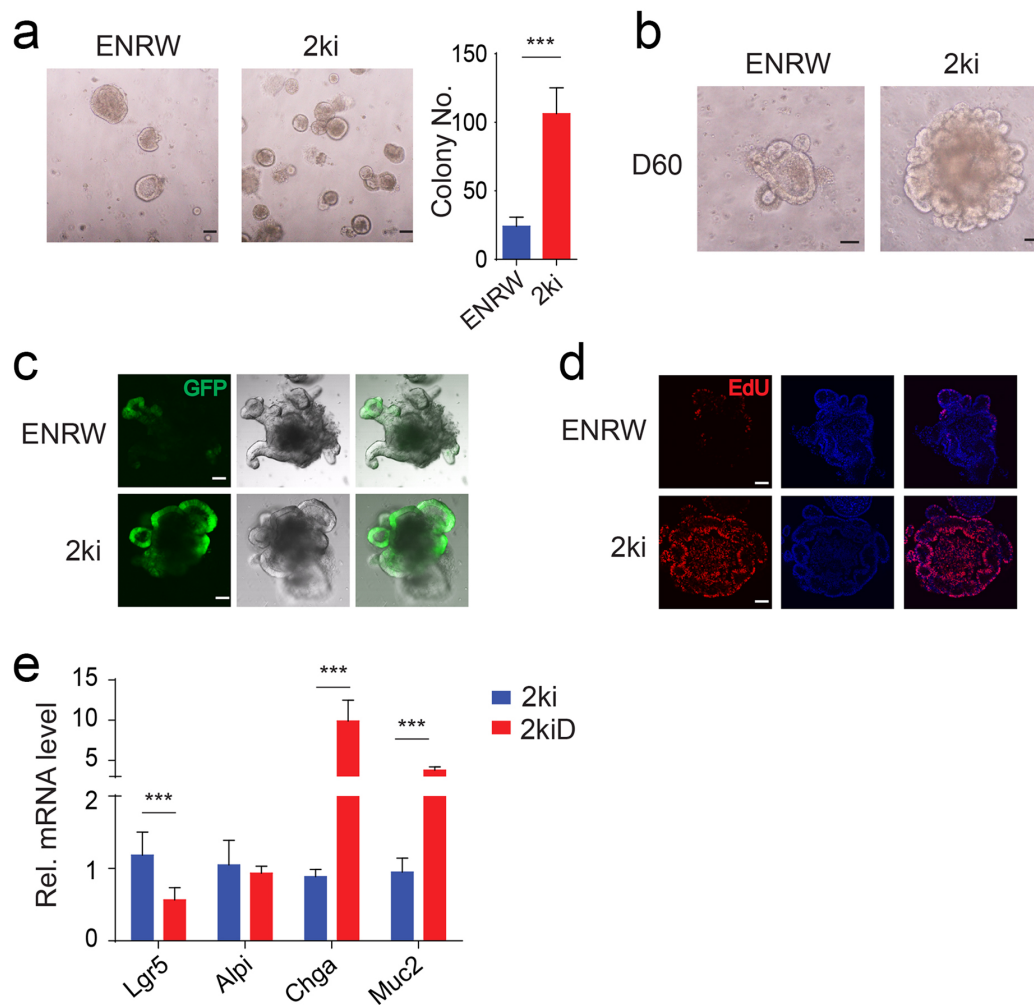

**Supplementary Figure 4. Long-term maintenance of colonic Lgr5<sup>+</sup> ISCs in 2ki condition.** **a** Representative images and quantitation of colony numbers of 5,000 FACS-isolated colon Lgr5-GFP<sup>+</sup> cells cultured with ENR plus Wnt3a (ENRW) or CHIR and LDN (2ki) for 7 days. **b-d** Representative bright-field (**b**), GFP fluorescence images (**c**) and EdU staining of proliferating cells (**d**) of colon organoids cultured with ENR and 2ki for 2 months. **e** Gene expression of stem cell and differentiated cell marker genes in colon organoids cultured with 2ki or 2ki+DAPT for 4 days. Scale bars, 100  $\mu$ m. \*\*\*P<0.001 analyzed by Two-way ANOVA test in **a** (n=9 wells from 3 mice) and by Student's t-test in **e** (n = 3 independent experiments). Error bars, s.d..
